# Supplementary material for: An Intelligent Compaction Analyser: A versatile platform for real-time recording, monitoring and analysing of road material compaction
Source: Research Square preprint supplement (doi:10.21203/rs.3.rs-2371914/v1), 2022-12-14
Supplement: Supplementary file 1 [file 4d82ce4a427811ebc1ede335.docx]

**Supplementary Table 1**

Abbreviation and acronyms.

| Acronym | Meaning |
| --- | --- |
| CCV | Compaction Control Value |
| CMV | Compaction Meter Value |
| CPU | Central Processing Unit |
| DAQ | Data Acquisition |
| DFT | Discrete Fourier Transform |
| GPR | Ground Penetrating Radar |
| GPU | Graphics Processing Unit |
| GNSS | Global Navigation Satellite System |
| HDMI | High-Definition Multimedia Interface |
| HPA | Horizontal Position Accuracy |
| IEPE | Integrated Electronics Piezo-Electric |
| IC | Intelligent Compaction |
| ICA | Intelligent Compaction Analyzer |
| ICM | Intelligent Compaction Mete |
| ICMV | Intelligent Compaction Measurement Values |
| IR | Infrared |
| SKb | Stiffness |
| LGPL | LESSER GENERAL PUBLIC LICENSE |
| MFD | Modified Fundamental Distortion |
| NTRIP | Networked Transport of RTCM via Internet Protocol |
| PCB | Printed Circuit Board |
| PPM | Pixels Per Meter |
| RAM | Random Access Memory |
| ROI | Region of Interest |
| RTK | Real-Time Kinematic |
| RTCM | Radio Technical Commission for Maritime |
| SBC | Single Board Computer |
| SEvib | SPARC Vibratory Modulus |
| SSID | Service Set Identifier |
| SSS | Solid-State Storage |
| THD | Total Harmonic Distortion |
| UI | User Interfaces |
| USB | Universal Serial Bus |
| VNC | Virtual Network Computing |

**Supplementary Table 2**

Software library dependencies.

| **Library** | **Description/Purpose** | **License** |
| --- | --- | --- |
| PySide2 | GUI library used for interface development | Lesser General Public License (LGPL) |
| PyQtGraph | Graphics library used for developing visualization tools | MIT License (MIT) |
| Numpy | Array library used for 2D pixel array manipulation | BSD License (BSD) |
| Pillow | Image Manipulation | Historical Permission Notice and Disclaimer (HPND) |
| SciPy | Mathematical Functions library | BSD License (BSD) |
| Matplotlib | Visualization library used here for color maps | Python Software Foundation License (PSF) |
| pymea2 | library for parse NMEA sentences | MIT License (MIT) |
| daqhats | drivers for MCC172 DAQ | NA |
| ads1015 | Reading analog data | MIT License (MIT) |
| Pickle | Saving and opening byte data | Python Software Foundation License (PSF) |

**Supplementary Figure 1**

Preliminary experiments were carried out on an outdoor test pit for the ICA device.


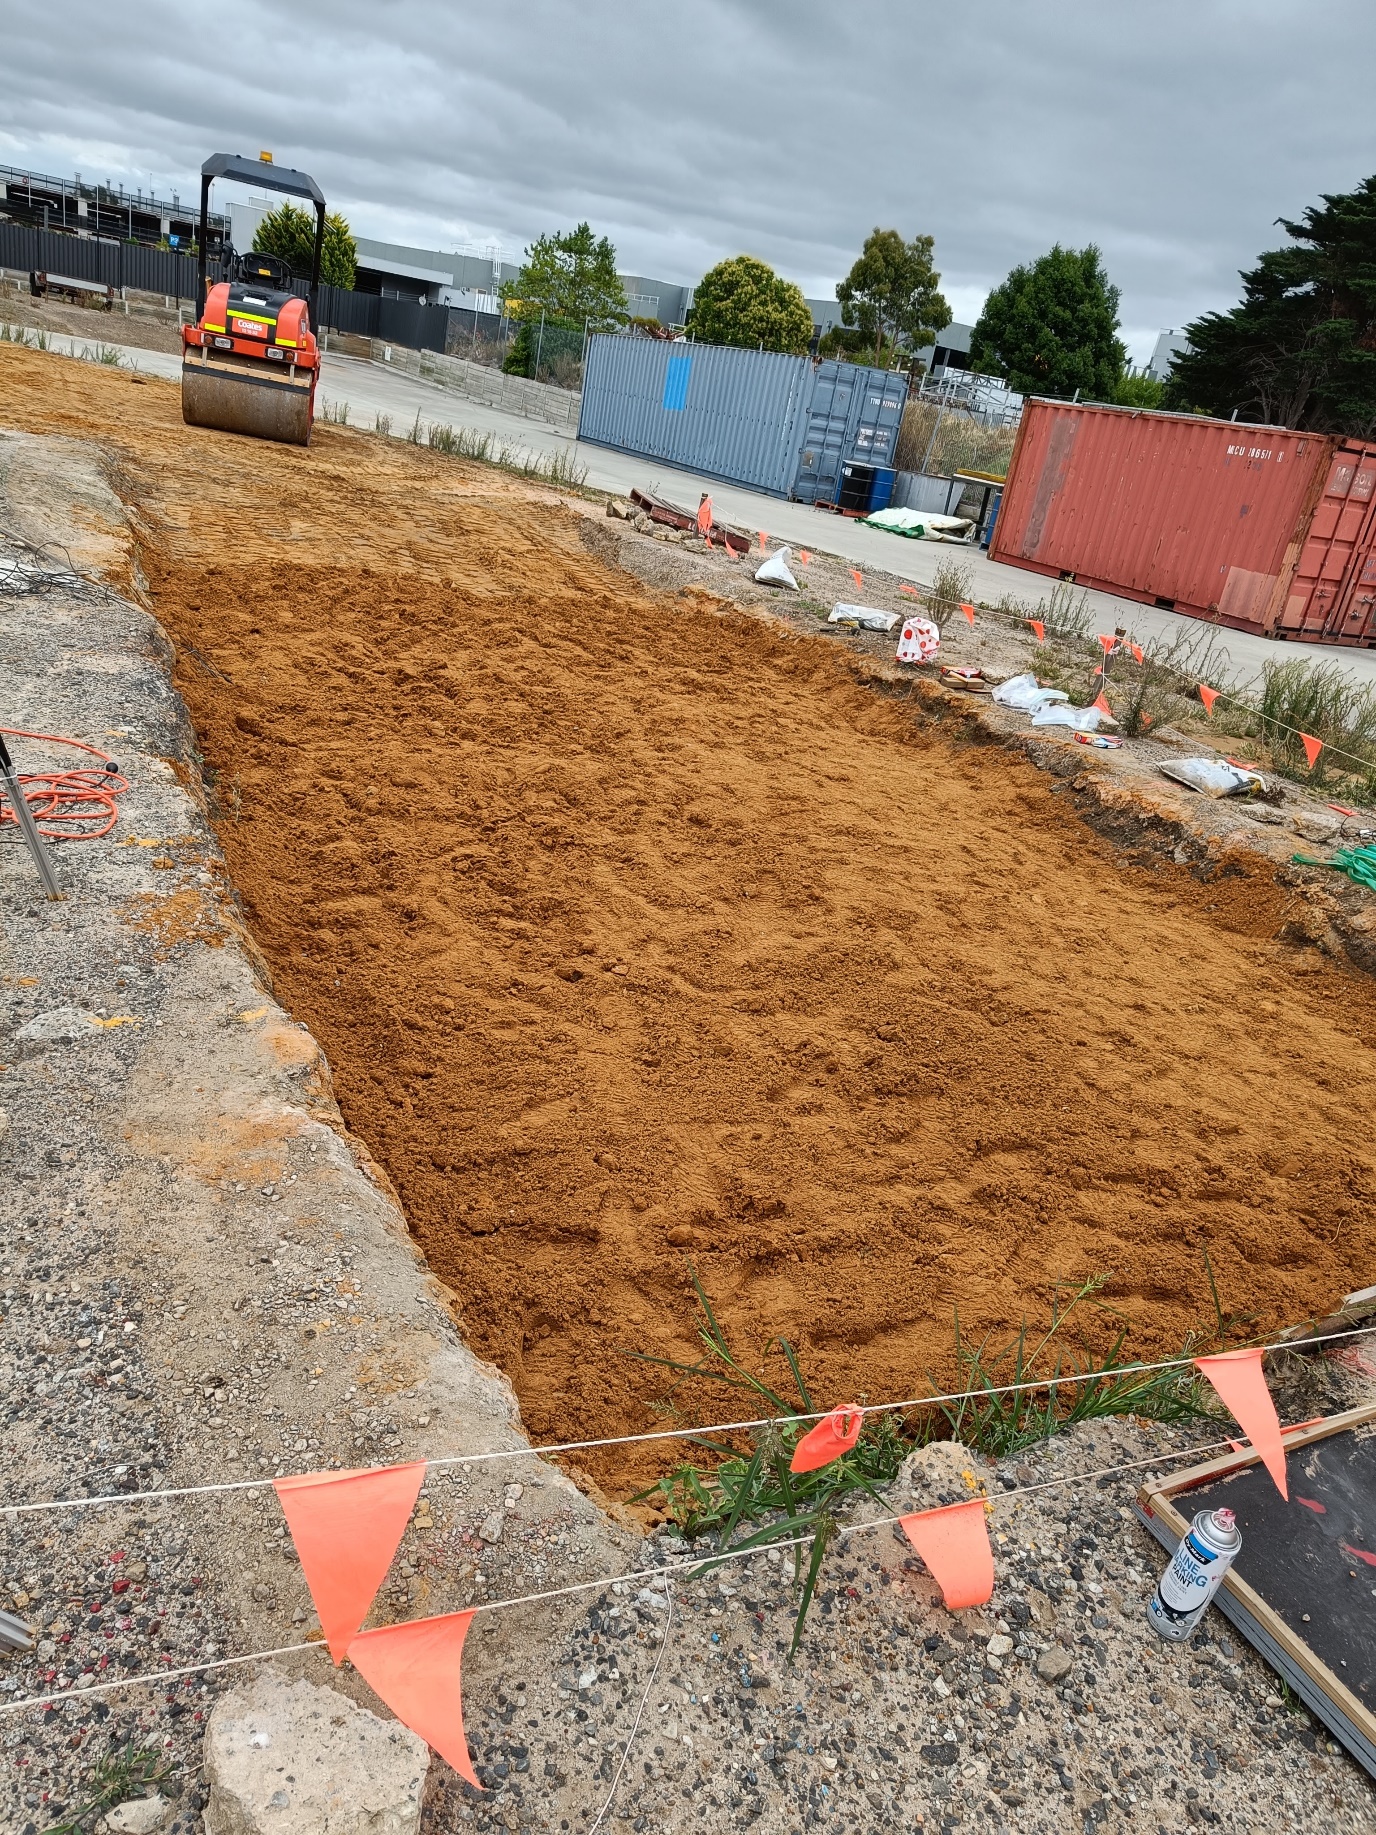


**Supplementary Figure 2**

Different parameters of ICA device collected for a soil layer over 10m length. The peaks at the beginning and end refers the starting and stopping of the compaction roller.


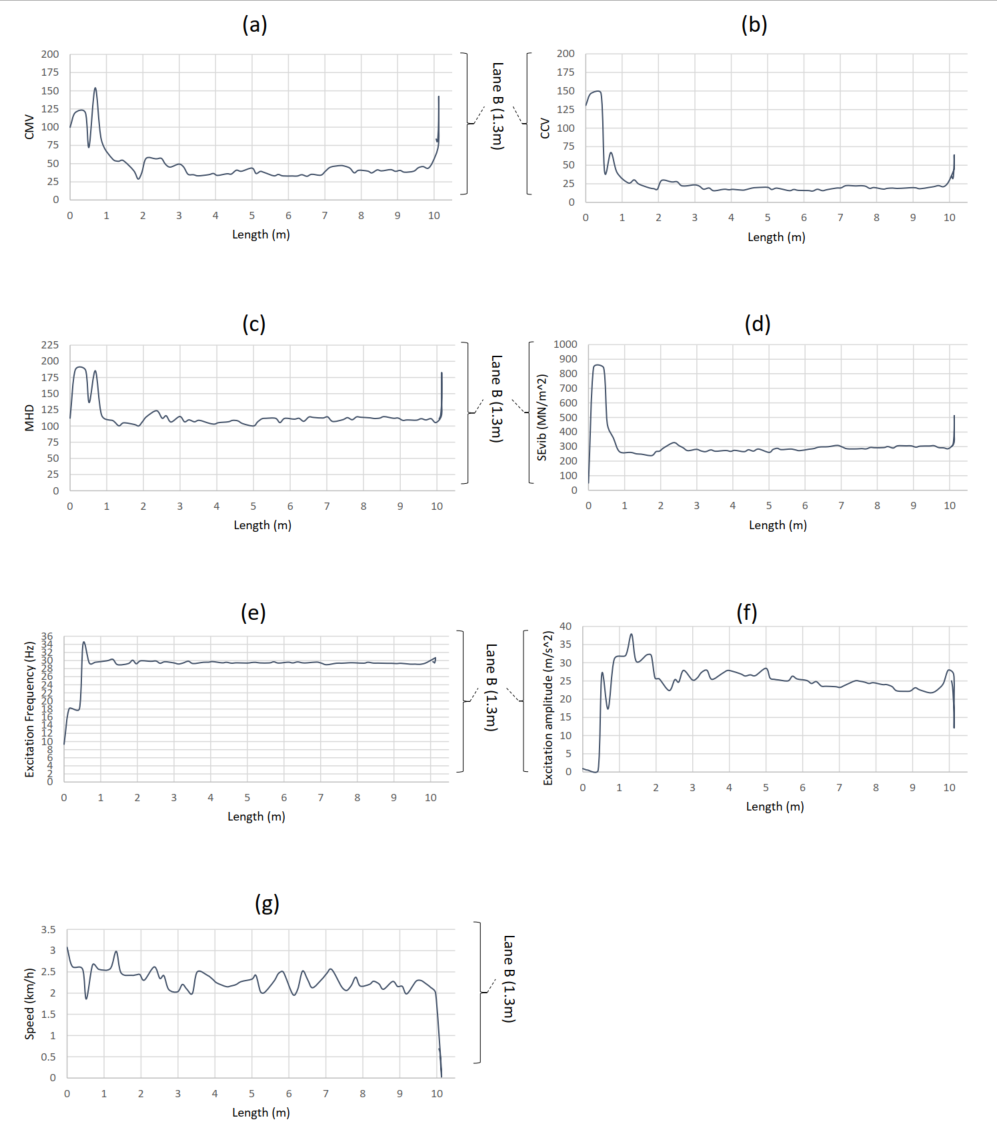


**Supplementary Figure 3**

Different parameters of ICA device collected for a unbound granular material (UGM) layer over 10m length. The peaks at the beginning and end refers the starting and stopping of the compaction roller.


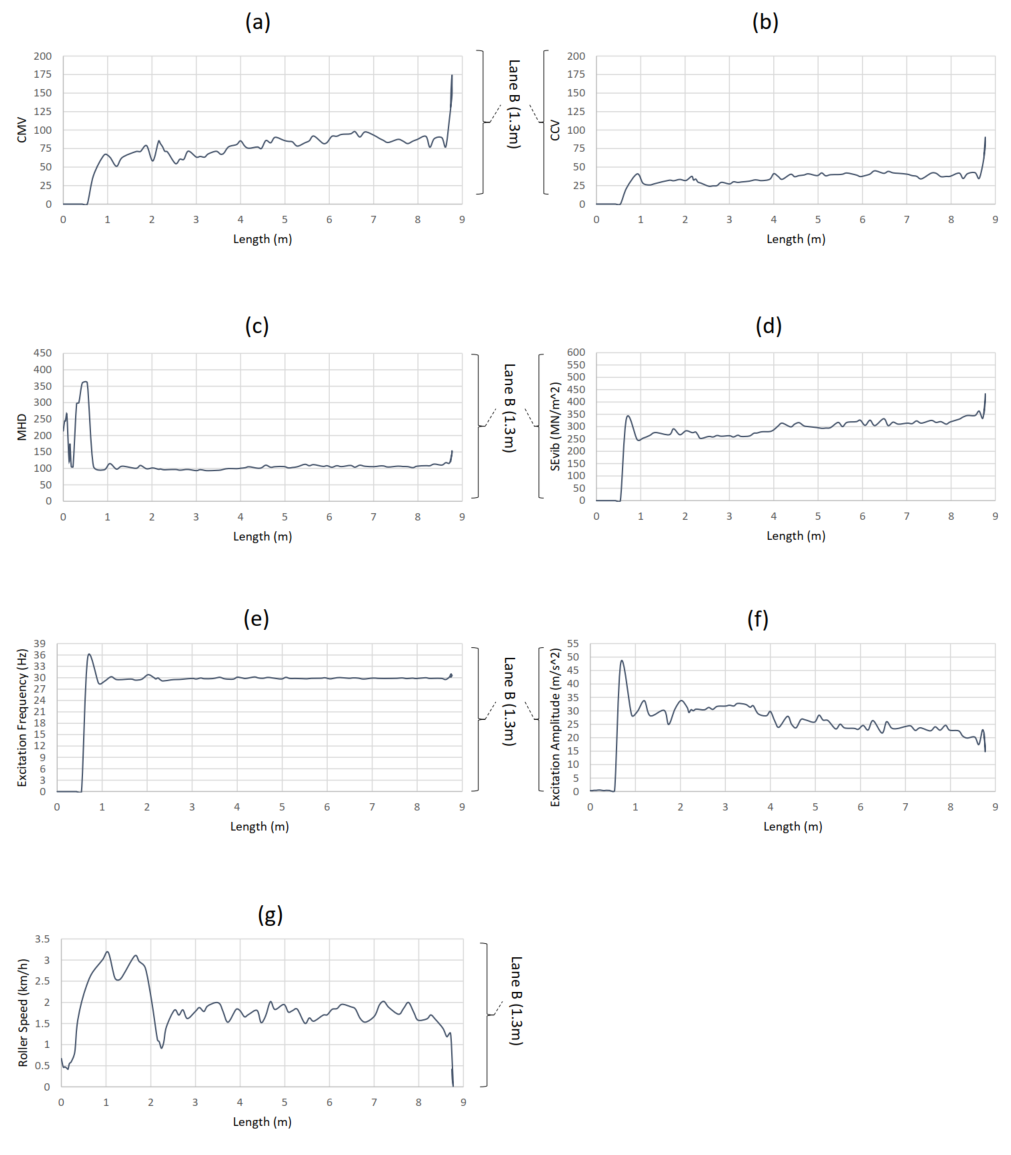


**Supplementary Figure 4**

All user interfaces (UI) of ICA device.


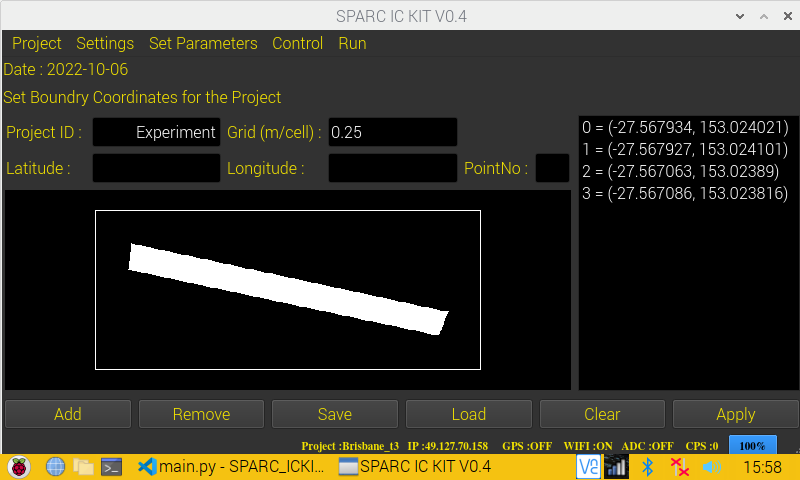


(a) Project User Interface


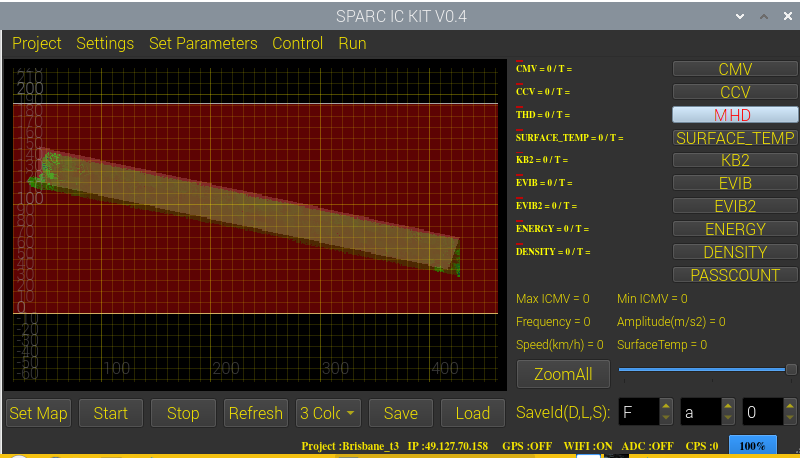


(b) Mapping User Interface


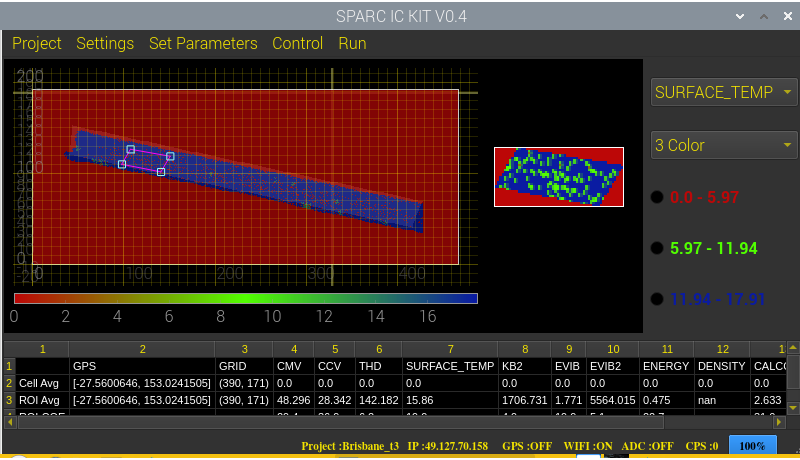


(c) Data Analyzing User Interface


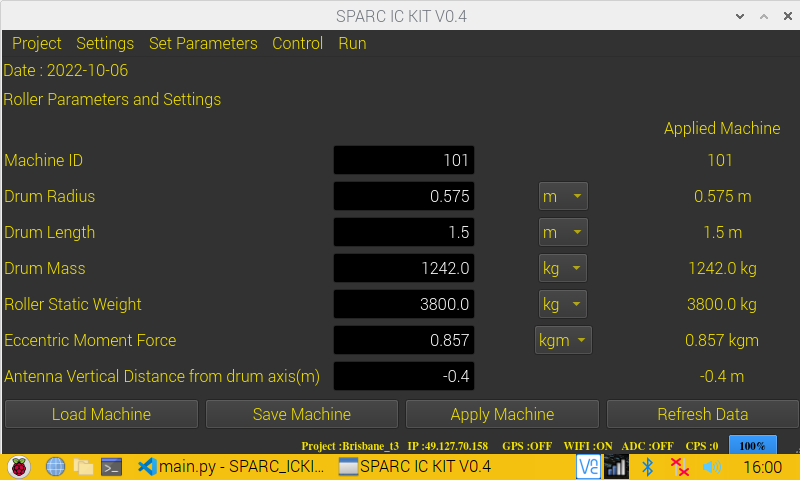


(d) Roller data User Interface


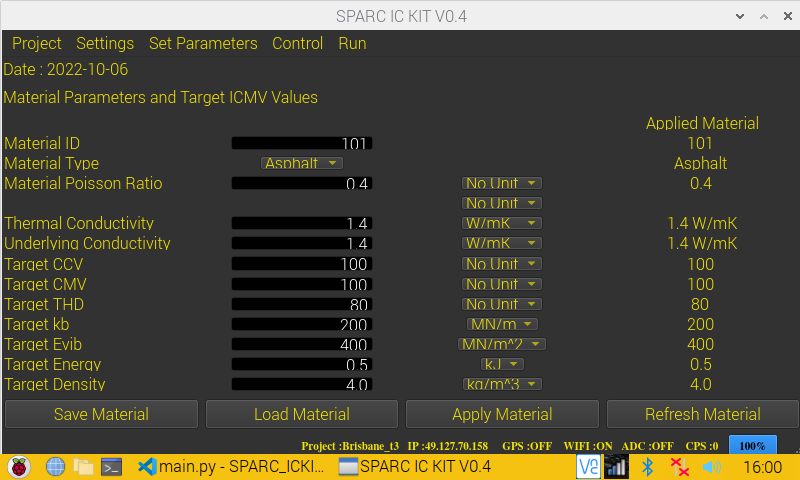


(e) Material data User Interface


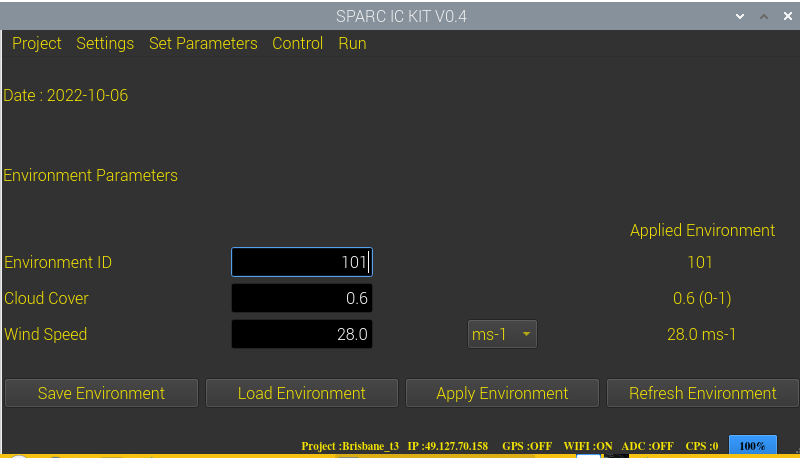


(f) Environment data User Interface

(g) GPS-RTK settings User Interface


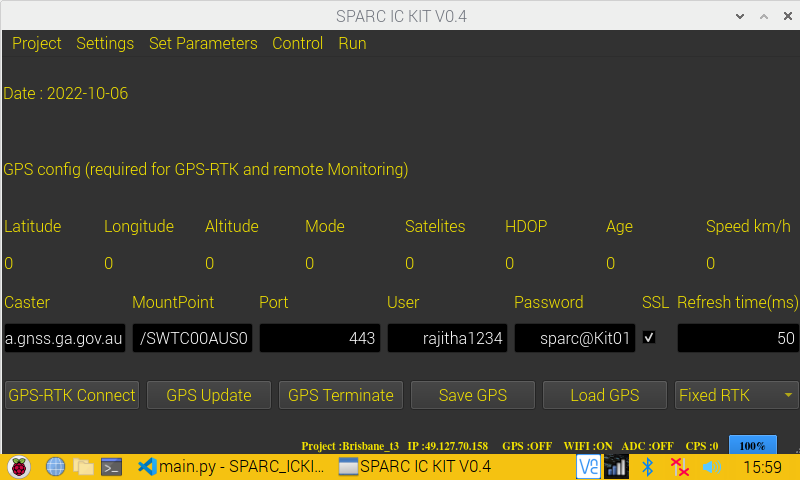


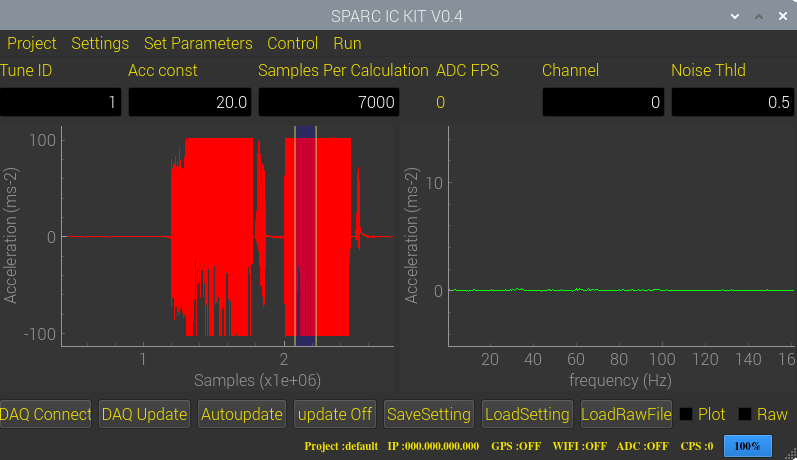


(h) DAQ data settings User Interface
